# Supplementary material for: Antibodies in serum of convalescent patients following mild COVID‐19 do not always prevent virus‐receptor binding
Source: PubMed Central journal article supplement (PMC7984338; doi:10.1111/all.14523), 2020-08-27

FIGURE S8.

### IgG

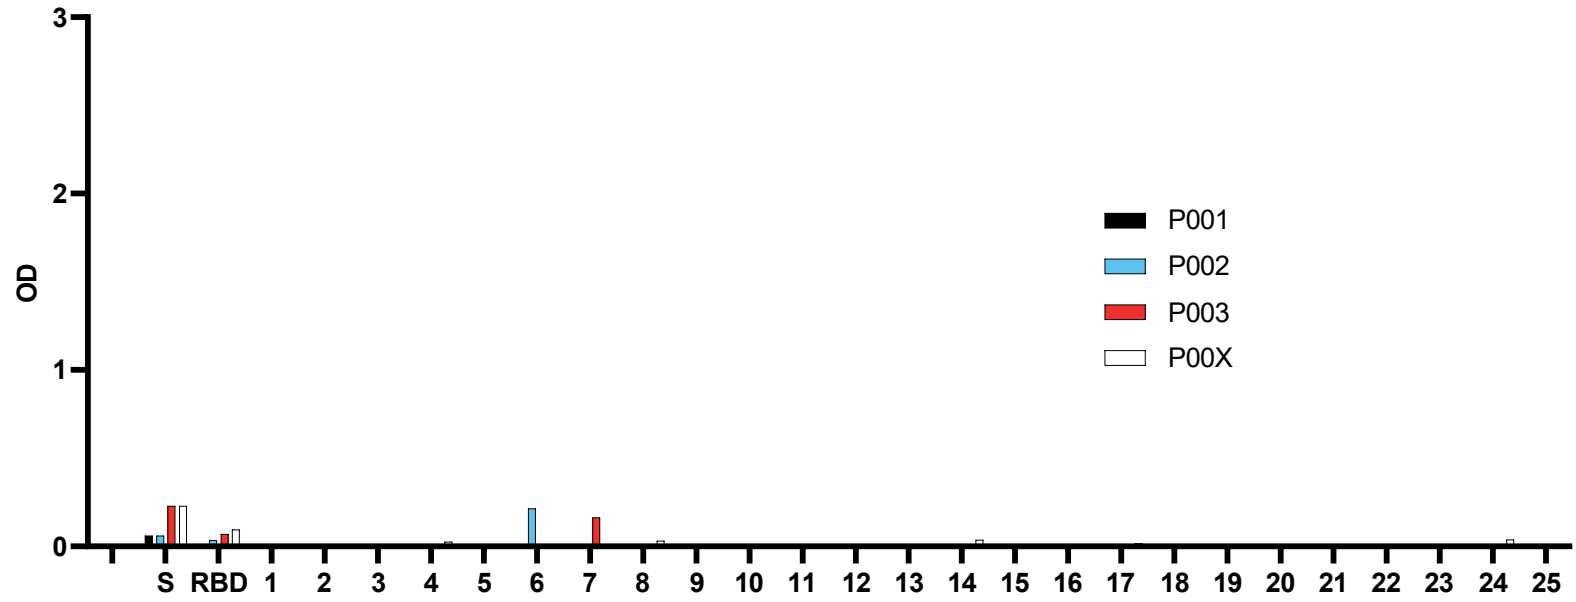

### IgM

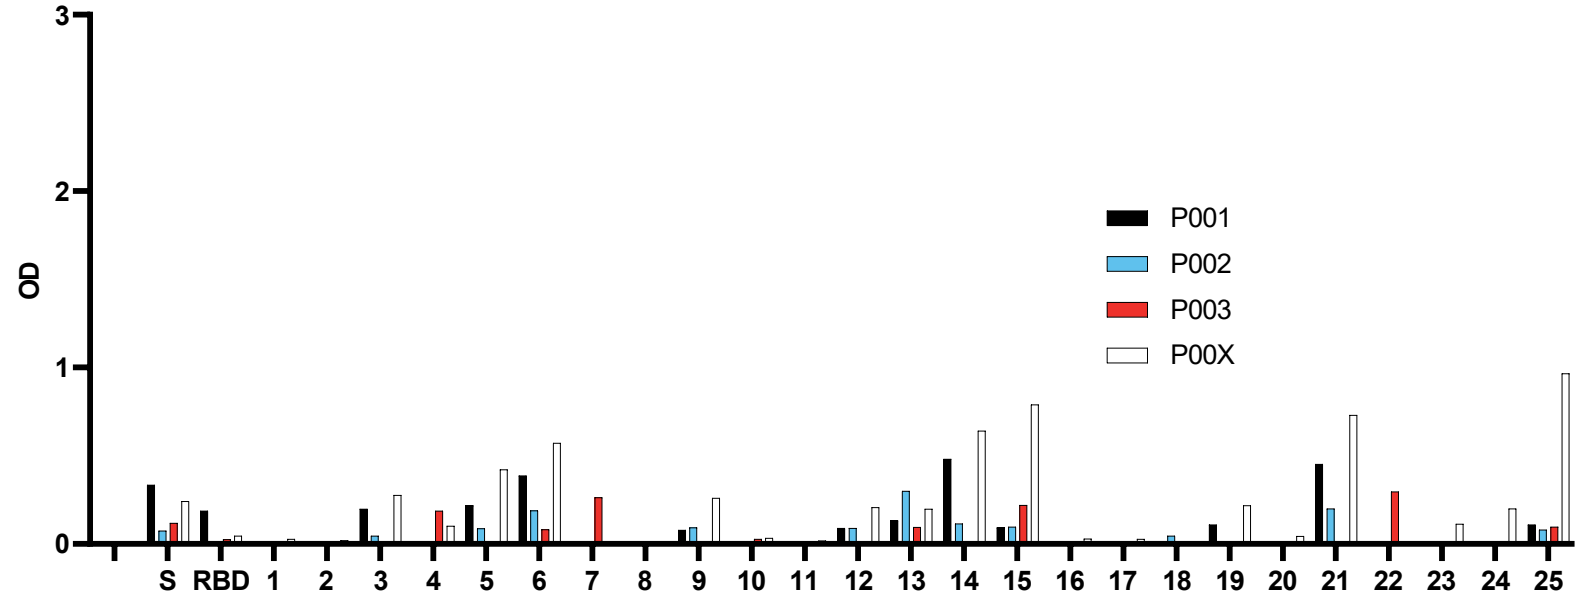

### IgA

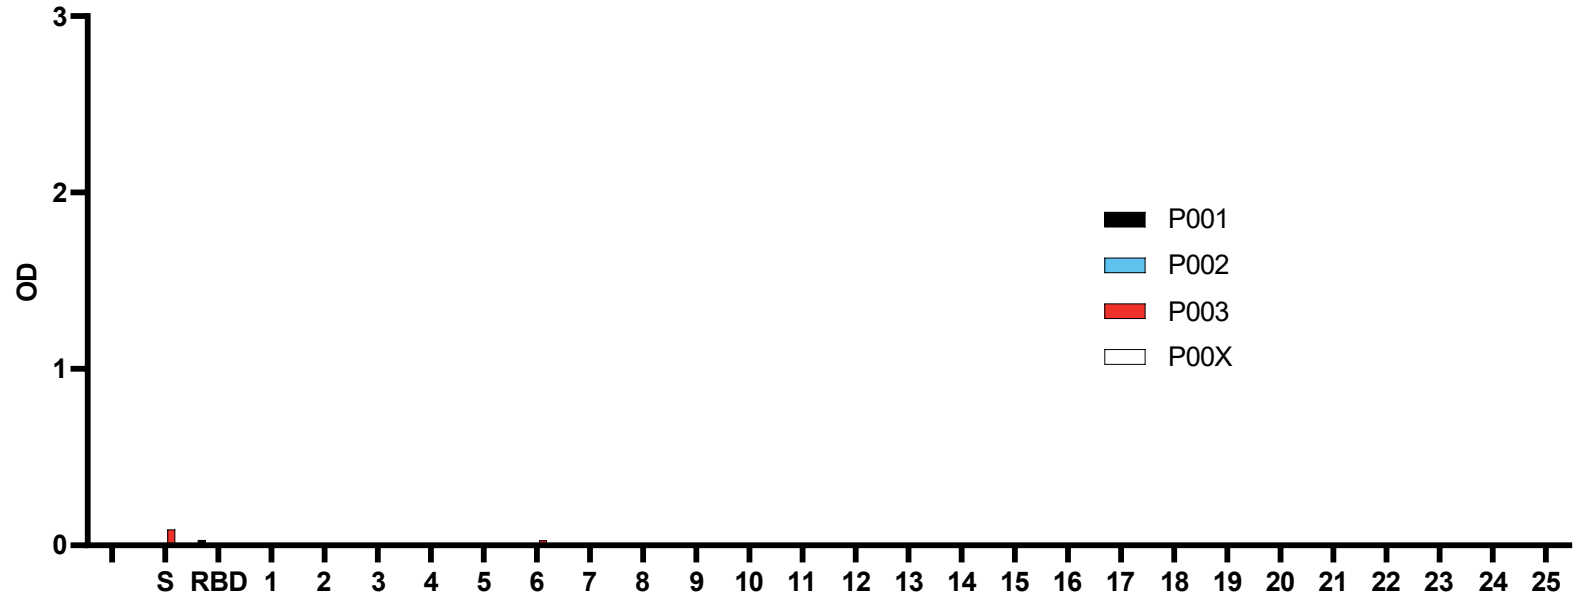

Supplement: ALL-76-878-s008.pdf [file ALL-76-878-s008.pdf]
