# Supplementary material for: Antibodies in serum of convalescent patients following mild COVID‐19 do not always prevent virus‐receptor binding
Source: PubMed Central journal article supplement (PMC7984338; doi:10.1111/all.14523), 2020-08-27
Supplement: ALL-76-878-s010.pdf [file ALL-76-878-s010.pdf]

FIGURE S10.

1

SARS\_CoV\_2 1 MFVFL-VLIPLVSSQCVNL-----TTRTQLPPAYTNSF-----  
 OC43 1 \*\*LI\*LIS\*\*TAFAVIGD\*KCTSDTSYINDKD\*GP\*\*IS\*DTVDVTNGLGTYVLDREVYL

2

SARS\_CoV\_2 33 -----TRGVYYPDKVFRSSVLHSTQDLFLPF-----  
 OC43 61 NNTLFLNGYYP\*S\*ST\*RNMAKLG\*\*\*L\*RLWFKP\*\*L\*DF-----

3

SARS\_CoV\_2 82 PVLFPNDGVYFASTEKSNIRGWIFGTTLDSKTQSLLIIVNNAATNVVI-----  
 OC43 102 -----IN\*I--\*\*KVKNTKV\*KDRVMYSEFPAI\*IGSTF\*\*TSYS\*\*VQPRTINSTQDGYN

4

SARS\_CoV\_2 129 -----KVCEFPFCNDPFLGVYHYKNNKSWMESEFRVYSSANNCTFEYVSQPFLMDLE  
 OC43 156 KLOGLLEVS\*\*QYNM\*EY\*Q--TIC\*P\*LGHRKELWHLDTGVVS\*LYK---RN\*TY\*VN

5

SARS\_CoV\_2 181 GKQGNFKNIREFVFKNIDGYFKIYSKHTPINLVRLDPQGFSALEPLVDLPIGINITRFQT  
 OC43 211 AD-----YLY\*H\*YQEG\*T\*YA\*FTD\*GV---\*T-----KF\*FNVYL-----

6

SARS\_CoV\_2 241 LLALHRSYLTTPGDSSSGWTAGA-AAYVGYLQPRTFLLKYNENGTITDAVDCALDPLSET  
 OC43 245 GM\*\*SHY\*VM\*LTCN\*KVKN\*FTLE\*W\*TP\*TS\*QY\*\*AF\*QD\*I\*FN\*\*MS\*FM\*\*I

7

SARS\_CoV\_2 300 KCTLKSFTVEKGIYQTSNFRVQPTESIVRFPNITNLCPFGVEFNATRFASVYAWNRRKRI  
 OC43 305 \*\*KTQ\*IAPPT\*V\*ELNGYT\*\*\*IADVY\*RKLNLPN\*NIEAWL\*DKSVP\*PLN\*E\*\*TF\*

8

SARS\_CoV\_2 360 NCVADYSVLYNSASFSTFKCYGVSPTRLNDLCFTNVYADSFVIRGDEVQRQIAPGQTGKIA  
 OC43 365 \*\*NFM\*S\*MSFIOADS\*T\*NNIDAA\*IYGM\*\*SSITI\*K\*A\*PNGRKVDLQ\*NL\*YLO

9

SARS\_CoV\_2 420 DYNKLPDDFTGCVIAVNSNLDKSKVG----GNYNLYRLFRKSNLKPFEFDISTEIQQA  
 OC43 425 SF\*\*RIDTTA\*S\*QLY\*LPAANVS\*SRFNPSTW\*KRFGFIED\*VF\*\*RPA\*GVL\*NHDVV

10

SARS\_CoV\_2 476 GSTPCNGVEGENCYFPLQ--S--YGFQPTNGVGYQPYRVVLSFELLHAPATV-----  
 OC43 485 YAQH\*FKAPKNF\*PCK\*NGSCVGS\*PGKN\*\*I\*TC\*AGTNY\*TCDN\*CT\*DPITFKATGT

11

SARS\_CoV\_2 525 -----CGP-----  
 OC43 545 YKCPQTKSLVGI GEHCSGLAVKSDYCGGNSCT\*R\*QAFGLWSADSLQGDKNIFANFIL

12

SARS\_CoV\_2 528 -----KKSTNLVKNKCVNFNFNGLTGTGVLTESNKKFL-PFQQFGRDIADT  
 OC43 605 HDVNSGLTCSTDLQ\*AN\*DIILGV\*\*YDLY\*IL\*Q\*IFV\*V\*ATYYNSW\*NLLY\*SNGN

13

SARS\_CoV\_2 573 TDAVRDPQTLIILDITPCSFGGVSVITPGTNTSNQMAVLYQDVNCTEVPVAIHADQLTPT  
 OC43 665 LYGF\*\*YI\*NRTFM\*RS\*YS\*R\*\*AAFHA--N\*SEP\*L\*FRNIK\*NY\*FNNSLTR\*\*Q\*-

14

SARS\_CoV\_2 633 WRVYSTGSNVFQTRAGCLIGAEHVN--N\*SYECDIPIGAGICASYQTQTNPPRRARSVASQ  
 OC43 722 -----I\*Y\*DSYL\*\*VVN\*YNSTAISVQT\*\*LTV\*S\*Y\*VD\*SKN-----\*\*S\*GAIIT

15

SARS\_CoV\_2 691 SIIAYTMSLGAENSVAYS-----NNSIAIPTNFTISVTTEILPVSMTKTSVDCTMYICG  
 OC43 771 GYRFTNFEPFTV\*\*ND\*L\*EPVGGLYE\*Q\*\*SE\*\*GNME\*FIQT\*SP\*VTI\*\*AAFV\*\*

16

SARS\_CoV\_2 745 DSTECNLLQYGSFCTQLNRALTGIAVEQDKNTQEVF-AQVKQIYKTPPIKDFGGFNFS  
 OC43 831 \*YAA\*KSQ\*VE\*\*\*\*\*DNI\*AI\*\*EVNELL\*TTQLQ\*ANSLMNGVTLSTKL\*\*GVN\*\*VD

17

SARS\_CoV\_2 804 QILP-----DPSKPSKRSFIEDLLFNKVTLADAGFIKQYGDCLGDIARDLICAQK  
 OC43 891 D\*NFSPLVGLGCLGSEC\*\*A\*S\*\*A\*\*\*\*\*D\*\*K\*S\*V\*\*VEA\*NN\*T\*GAELI\*\*\*\*\*V\*S

18

SARS\_CoV\_2 855 FNGLTVLPPLLTDEMAIQYTSALLAGTITSGWTFGAGAAIQIPFAMQMA YRFNGIGVTQN  
 OC43 951 YK\*IK\*\*\*\*\*SENQ\*SG\*\*L\*ATSASLFPL\*\*AA----AGV\*\*YLVNQ\*\*I\*\*L\*\*MD

19

SARS\_CoV\_2 915 VLYENQKLIANQFNSAIGKIQDSLSTASALGKLQDVVNQNAQALNTLVKQLSSNFGAIS  
 OC43 1007 \*\*SQ\*\*\*\*\*A\*\*N\*LYA\*\*EGFDA\*N\*\*V\*I\*A\*\*A\*\*E\*\*N\*LQ\*\*\*\*\*NR\*\*\*\*\*

20

SARS\_CoV\_2 975 SVLNDILSRLDKVEAEVQIDRLITGRQLQSLQTYVTQQLIRAAEIRASANLAATKMSECVL  
 OC43 1067 AS\*QE\*\*\*\*\*AL\*\*A\*\*\*\*\*N\*\*TA\*NA\*\*S\*\*SDSTLVKF\*\*AQ\*ME\*VN\*\*K

21

SARS\_CoV\_2 1035 GQSKRVDFCGKGYHLSFPQSAPHGVVFLHVTVYVPAQEKNFTTAPAICHGDK-AHFPREG  
 OC43 1127 S\*\*S\*IN\*\*N\*N\*II\*LV\*N\*\*Y\*LY\*I\*FS\*\*TKYVTARVS\*GL\*IA\*DRGIA\*KS\*

22

SARS\_CoV\_2 1094 VFVSNHGWTFVTRNFYEPQIITDNTFVSGNCDVVIGIVNNTVYDPLQPELDSFKEELD  
 OC43 1187 Y\*\*NVNNT\*MY\*GSGY\*Y\*EP\*\*EN\*VV\*MST\*A\*NYTKAPYVMLNTSI\*N\*PD\*\*\*\*\*

23

SARS\_CoV\_2 1154 KYFKNHTSPVDLGDISGINASVVNIQKEIDRLNEVAKNLNESLIDLQELGKYEQYIKWP  
 OC43 1247 QW\*\*Q\*\*VAP\*\*S-LDY\*\*VTFLDL\*V\*MN\*\*Q\*AI\*V\*\*Q\*Y\*N\*KDI\*T\*\*Y\*V\*\*\*

24

SARS\_CoV\_2 1214 WYIWLGFIAGLIAIVMVTIMLCCMTSC-CSCLKGCCSCGSCCKFDEDDSEPVLGKVKLHY  
 OC43 1306 \*\*V\*\*LICLAGV\*MLVLLFFI\*\*C\*G\*GT\*\*F\*K---\*G\*\*DDYTG\*Y\*Q\*L\*I\*TSHD--

SARS\_CoV\_2 1273 T  
 OC43 1361 D
